# Supplementary material for: Colorimetric determination using digital image processing of sensor based on polymer-stabilized silver nanoparticles: monitoring of glucose in saliva
Source: Royal Society of Chemistry journal article supplement (doi:10.1039/d5ay00662g), 2025-01-01
Supplement: d5ay00662g1.pdf [file d5ay00662g1.pdf]

## Supplementary Material

Colorimetric determination using digital image processing of sensor based on polymer-stabilized silver nanoparticles: monitoring of glucose in saliva

Nadezhda Saranchina, Darya Kuznetsova, Sofia Bragina, Kirill Serebriakov, Nataliya Gavrilenko, Mikhail Gavrilenko\*

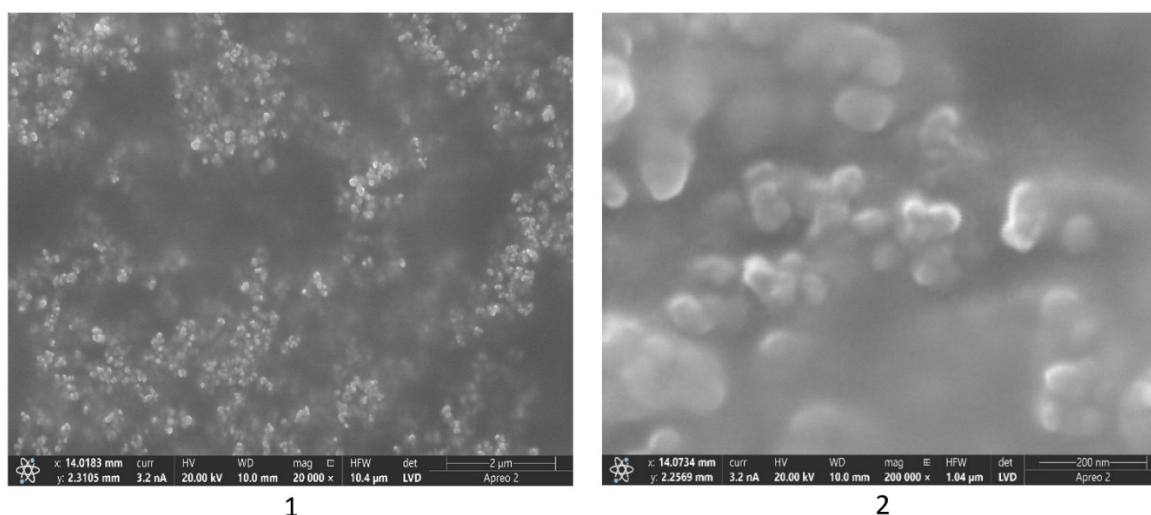

**Fig. S1.** SEM images of PMM-Ag with different scales 2μm (1) and 200 nm (2)

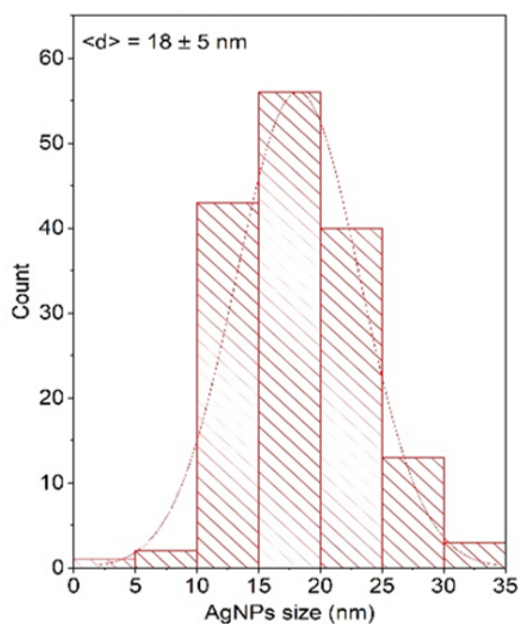

**Fig. S2.** Size distribution of Ag NPs in PMM prepared by thermal reduction.

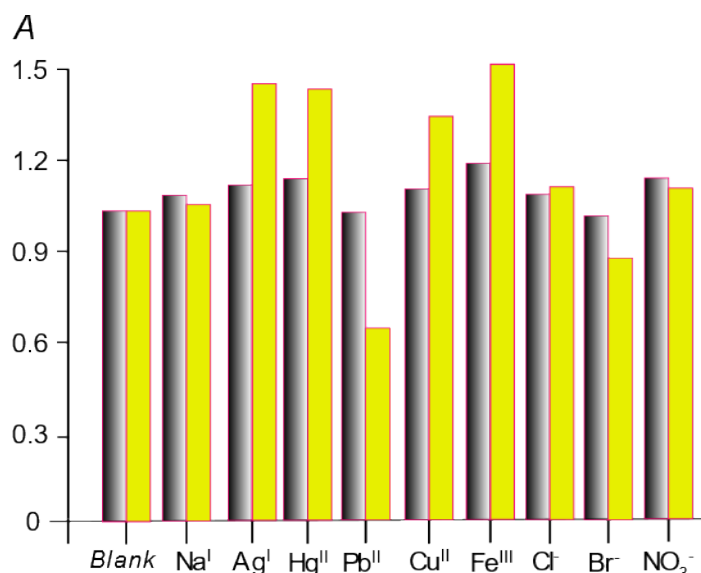

Fig. S3. Selectivity of the spectrophotometric (1) and the colorimetric (2) glucose determination using PMM-Ag<sup>0</sup> in the presence of interfering substances  $C_{\text{GLU}} = 0.40 \text{ mM}$ ,  $n=3$ , ratio 1:10)

**Table S1.** Comparison between our sensor and that of other jobs

| object                                  | Sensor system                               | AR, $\mu\text{M}$ | LOD, $\mu\text{M}$ | References |
|-----------------------------------------|---------------------------------------------|-------------------|--------------------|------------|
| H <sub>2</sub> O <sub>2</sub> , glucose | NPs Ag / L-cysteine solution                | 50 -1000          | 10                 | [1]        |
| H <sub>2</sub> O <sub>2</sub> , glucose | NPs Ag / 5-amino-2-fluorophenylboronic acid | 250–20000         | 90                 | [2]        |
| H <sub>2</sub> O <sub>2</sub> , glucose | NPs Ag / L-cysteine solution                | 5–70              | 3                  | [3]        |
| H <sub>2</sub> O <sub>2</sub> , glucose | NPs Ag / PVA solution                       | 0.3–25            | 0.2                | [4]        |
| H <sub>2</sub> O <sub>2</sub> , glucose | NPs Ag / Graphene quantum dots              | 0.5-50            | 0.16               | [5]        |
| H <sub>2</sub> O <sub>2</sub> , glucose | NPs Ag / Reduced Graphene Oxide             | 125-1000          | 40                 | [6]        |
| H <sub>2</sub> O <sub>2</sub>           | NPs Ag / PMMA solution                      | 30 -500           | 10                 | [7]        |
| H <sub>2</sub> O <sub>2</sub> , glucose | growth AgNPs                                | 0.5-60            | 0.2                | [8]        |
| glucose                                 | NPs Ag / PMM                                | 100-5600          | 50                 | This work  |

#### References:

1. Hoang V. Tran, Luyen T. Tran, Tinh V. Nguyen, Cuong D. Nguyen, Silver triangular nanoplates – A multifunctional probe for development of a label-free colorimetric glucose biosensors. Application to glucose in foods and medical samples, Materials Chemistry and Physics, Volume 293, 2023, 126912

2. Ke Cao, Xiaomei Jiang, Suting Yan, Laiying Zhang, Weitai Wu, Phenylboronic acid modified silver nanoparticles for colorimetric dynamic analysis of glucose, *Biosensors and Bioelectronics*, Volume 52, 2014, pp. 188-195
3. Yan Gao, Yiting Wu, Junwei Di, Colorimetric detection of glucose based on gold nanoparticles coupled with silver nanoparticles, *Spectrochimica Acta Part A: Molecular and Biomolecular Spectroscopy*, Volume 173, 2017, pp. 207-212
4. Sanaz Sajedi-Amin, Maryam Khoubnasabjafari, Vahid Jouyban-Gharamaleki, Elaheh Rahimpour, Abolghasem Jouyban, Propofol-induced in-situ formation of silver nanoparticles: A sensing colorimetric method, *Journal of Pharmaceutical and Biomedical Analysis*, Volume 229, 2023, 115377
5. Nghia Duc Nguyen, Tuan Van Nguyen, Anh Duc Chu, Hoang Vinh Tran, Luyen Thi Tran, Chinh Dang Huynh, A label-free colorimetric sensor based on silver nanoparticles directed to hydrogen peroxide and glucose, *Arabian Journal of Chemistry*, Volume 11, Issue 7, 2018, pp. 1134-1143
6. Tran, H. V., Nguyen, N. D., Tran, C. T. Q., Tran, L. T., Le, T. D., Tran, H. T. T., ... Phan, N. T., Silver Nanoparticles-Decorated Reduced Graphene Oxide: A Novel Peroxidase-Like Activity Nanomaterial for Development of a Colorimetric Glucose Biosensor, *Arabian Journal of Chemistry*, 2020, 13(7).
7. Giorgio Giuseppe Carbone, Antonio Serra, Alessandro Buccolieri, Daniela Manno A silver nanoparticle-poly(methyl methacrylate) based colorimetric sensor for the detection of hydrogen peroxide. *Helion*, 2019, 5(11), E02887
8. Zhang Y. A quantitative colorimetric assay of H<sub>2</sub>O<sub>2</sub> and glucose using silver nanoparticles induced by H<sub>2</sub>O<sub>2</sub> and UV / Y. Zhang [et all] // *Chinese Chemical Letters*. – 2013. – Vol. 24, № 12. – P. 1053 – 1058.
